# Supplementary material
Source: PubMed Central journal article supplement (PMC5738270)
Supplement: NIHMS923444-supplement-Sup_1.pdf [file NIHMS923444-supplement-Sup_1.pdf]

**Table S1. Decontamination efficacy in terms of mean LR for *B.a.* and *B.g.* for tests 1 through 5. Bold text indicates value is significantly higher (P<0.05) when comparing *B.a.* and *B.g.***

| Test No. | Material                     | B.a. Efficacy | B.g. Efficacy |
|----------|------------------------------|---------------|---------------|
| 1        | Rubber Flooring              | 7.33          | 6.35          |
|          | New Grease with Spores Mixed | 0.85          | 1.57          |
|          | Used Railcar Filter          | ≥7.89         | ≥6.75         |
|          | Mylar                        | ≥7.83         | ≥7.13         |
|          | Fiberglass Interior Siding   | 4.93          | 5.61          |
|          | Unpainted Concrete           | <b>1.57</b>   | 1.03          |
| 2        | Rubber Flooring              | ≥8.07         | ≥7.30         |
|          | New Grease (SOT)             | 5.93          | 6.39          |
|          | New Railcar Air Filter       | ≥7.99         | 6.59          |
|          | Mylar                        | 7.56          | 6.98          |
|          | Fiberglass Interior Siding   | 6.03          | 5.84          |
|          | Railcar Carpet               | 1.24          | 0.70          |
| 3        | Rubber Flooring              | ≥7.94         | ≥7.21         |
|          | Upholstery                   | ≥8.08         | ≥6.86         |
|          | Aluminum                     | ≥7.88         | ≥7.06         |
|          | Mylar                        | ≥8.06         | ≥6.89         |
|          | Fiberglass Interior Siding   | ≥7.58         | ≥6.47         |
|          | Railcar Carpet               | 2.37          | 2.49          |
| 4        |                              | 1.71          | 2.54          |
|          |                              | 2.69          | 2.68          |
|          | Railcar Carpet               | 1.84          | 2.71          |
|          |                              | 1.66          | 2.34          |
|          |                              | 2.84          | 3.27          |
|          |                              |               |               |
| 5        | Railcar Carpet               | 2.16          | 2.23          |
|          | Unpainted Concrete           | <b>1.66</b>   | 0.30          |
|          | Used Railcar Air Filter      | ≥7.80         | ≥6.72         |
|          | New Grease (SOT)             | 5.97          | 6.38          |
|          | New Grease with Spores Mixed | 1.78          | <b>4.83</b>   |
|          | Used Grease (SOT)            | ≥7.72         | 5.94          |

**Table S2. Decontamination efficacy in terms of mean LR for *B.a.* and *B.g.* for tests 6 through 10. Bold text indicates value is significantly higher (P<0.05) when comparing *B.a.* and *B.g.***

| Test No. | Material                     | B.a. Efficacy | B.g. Efficacy |
|----------|------------------------------|---------------|---------------|
| 6        | Railcar Carpet               | <b>6.26</b>   | 1.36          |
|          | New Grease with Spores Mixed | 2.77          | 2.33          |
|          | Used Railcar Air Filter      | ≥7.80         | ≥6.91         |
|          | Fiberglass Interior Siding   | 6.86          | ≥6.84         |
|          | Unpainted Concrete           | <b>2.70</b>   | 0.78          |
|          | Used Grease (SOT)            | 6.22          | ≥6.88         |
| 7        | Railcar Carpet               | 3.31          | 2.09          |
|          | New Grease with Spores Mixed | 1.99          | 2.83          |
|          | New Grease (SOT)             | <b>7.61</b>   | 5.21          |
|          | Fiberglass Interior Siding   | 5.56          | 5.24          |
|          | Unpainted Concrete           | 1.91          | 2.21          |
|          | Used Grease (SOT)            | ≥ <b>7.91</b> | 5.98          |
| 8        | Rubber Flooring              | 7.11          | ≥7.31         |
|          | New Grease (SOT)             | 3.40          | 3.58          |
|          | New Railcar Air Filter       | 6.47          | ≥6.64         |
|          | Mylar                        | 7.62          | ≥7.26         |
|          | Fiberglass Interior Siding   | 3.39          | 3.21          |
|          | Railcar Carpet               | 0.54          | 1.43          |
| 9        | Railcar Carpet               | 0.73          | 0.99          |
|          | Unpainted Concrete           | 1.24          | 1.36          |
|          | Used Railcar Air Filter      | ≥7.68         | ≥6.96         |
|          | New Grease (SOT)             | 3.81          | 4.97          |
|          | New Grease with Spores Mixed | 0.77          | <b>2.16</b>   |
|          | Used Grease (SOT)            | 3.31          | 5.50          |
| 10       | Rubber Flooring              | ≥7.89         | ≥7.28         |
|          | Upholstery                   | 7.12          | ≥7.20         |
|          | Aluminum                     | 7.38          | ≥7.35         |
|          | Mylar                        | ≥7.78         | ≥7.19         |
|          | Fiberglass Interior Siding   | 6.56          | 5.30          |
|          | Railcar Carpet               | 0.99          | 1.48          |

**Table S3. Decontamination efficacy in terms of mean LR for *B.a.* and *B.g.* for tests 11 through 15. Bold text indicates value is significantly higher (P<0.05) when comparing *B.a.* and *B.g.***

| Test No. | Material                     | B.a. Efficacy | B.g. Efficacy |
|----------|------------------------------|---------------|---------------|
| 11       | Railcar Carpet               | 3.69          | 1.13          |
|          | New Grease with Spores Mixed | 0.67          | 2.82          |
|          | New Industrial Carpet        | 4.32          | 4.81          |
|          | Fiberglass Interior Siding   | 6.17          | ≥6.61         |
|          | Unpainted Concrete           | 1.5           | 2.13          |
|          | Used Grease (SOT)            | 5.29          | 5.75          |
| 12       | Rubber Flooring              | ≥7.98         | ≥6.81         |
|          | Upholstery                   | ≥7.99         | ≥6.23         |
|          | Aluminum                     | ≥8.01         | ≥7.18         |
|          | Mylar                        | ≥7.93         | ≥6.96         |
|          | Fiberglass Interior Siding   | 6.77          | 6.00          |
|          | Carpet                       | 4.51          | 5.71          |
| 13       | Rubber Flooring              | ≥7.93         | 6.12          |
|          | New Grease (SOT)             | 1.70          | 3.74          |
|          | New Railcar Air Filter       | 5.85          | ≥6.38         |
|          | Mylar                        | ≥7.93         | ≥6.99         |
|          | Fiberglass Interior Siding   | 3.58          | 4.07          |
|          | Railcar Carpet               | 0.39          | 0.41          |
| 14       | Railcar Carpet               | 2.29          | 2.27          |
|          | New Grease with Spores Mixed | 2.69          | 2.59          |
|          | Used Railcar Air Filter      | 6.74          | ≥6.82         |
|          | Fiberglass Interior Siding   | 6.61          | 5.26          |
|          | Unpainted Concrete           | 1.57          | 1.41          |
|          | Used Grease (SOT)            | 5.73          | ≥6.92         |
| 15       | Railcar Carpet               | 3.43          | 1.62          |
|          | New Grease with Spores Mixed | <b>2.64</b>   | 0.8           |
|          | Used Railcar Air Filter      | ≥ <b>7.87</b> | 5.78          |
|          | Fiberglass Interior Siding   | 5.56          | 4.32          |
|          | Unpainted Concrete           | 0.7           | 0.67          |
|          | Used Grease (SOT)            | 4.44          | 4.08          |

**Table S4. Decontamination efficacy in terms of mean LR for *B.a.* and *B.g.* for tests 16 through 21. Bold text indicates value is significantly higher (P<0.05) when comparing *B.a.* and *B.g.***

| Test No. | Material                     | <i>B.a.</i> Efficacy | <i>B.g.</i> Efficacy |
|----------|------------------------------|----------------------|----------------------|
| 16       | Railcar Carpet               | 2.44                 | 2.46                 |
|          | Unpainted Concrete           | 1.27                 | 2.07                 |
|          | Used Railcar Air Filter      | ≥7.85                | ≥7.20                |
|          | New Grease (SOT)             | 7.00                 | ≥6.41                |
|          | New Grease with Spores Mixed | 1.00                 | 1.57                 |
|          | Used Grease (SOT)            | 5.76                 | 5.67                 |
| 17       | Rubber Flooring              | ≥7.84                | ≥7.04                |
|          | Upholstery                   | ≥7.97                | ≥7.56                |
|          | Aluminum                     | ≥7.95                | ≥7.65                |
|          | Mylar                        | ≥7.90                | ≥7.39                |
|          | Fiberglass Interior Siding   | 5.97                 | ≥6.66                |
|          | Railcar Carpet               | 3.85                 | 1.70                 |
| 18       | Railcar Carpet               | <b>4.90</b>          | 2.92                 |
|          | New Grease with Spores Mixed | 2.40                 | 2.47                 |
|          | Used Railcar Air Filter      | ≥7.92                | ≥6.93                |
|          | Fiberglass Interior Siding   | 6.94                 | 6.71                 |
|          | Unpainted Concrete           | 2.41                 | 2.04                 |
|          | Used Grease (SOT)            | 7.17                 | 5.94                 |
| 19       | Railcar Carpet               | <b>0.49</b>          | -0.04                |
|          | Unpainted Concrete           | 0.6                  | 0.64                 |
|          | Used Railcar Air Filter      | 2.1                  | 2.63                 |
|          | New Grease (SOT)             | 0.21                 | <b>0.92</b>          |
|          | New Grease with Spores Mixed | 0.13                 | <b>1.36</b>          |
|          | Used Grease (SOT)            | 0.24                 | 0.91                 |
| 20       | Railcar Carpet               | <b>1.43</b>          | 0.90                 |
|          | New Grease with Spores Mixed | 1.65                 | 2.55                 |
|          | Used Railcar Air Filter      | 7.37                 | ≥6.84                |
|          | Fiberglass Interior Siding   | 5.38                 | ≥6.63                |
|          | Unpainted Concrete           | 2.06                 | 1.90                 |
|          | Used Grease (SOT)            | 3.87                 | 5.92                 |
| 21       | Carpet                       | 1.01                 | 1.05                 |
|          | New Grease with Spores Mixed | 1.15                 | 1.25                 |
|          | Used Railcar Air Filter      | 7.08                 | ≥6.96                |
|          | Fiberglass Interior Siding   | 5.30                 | 5.63                 |
|          | Unpainted Concrete           | <b>1.87</b>          | 1.10                 |
|          | Used Grease (SOT)            | 2.34                 | 4.98                 |
